# Supplementary material for: Optimised synthesis and further structural diversity of ytterbium benzene-1,4-dicarboxylate MOFs
Source: Royal Society of Chemistry journal article supplement (doi:10.1039/d3ce00865g), 2023-01-01
Supplement: d3ce00865g1.pdf [file d3ce00865g1.pdf]

## Supporting Information

### Optimised Synthesis and Further Structural Diversity of Ytterbium Benzene-1,4-Dicarboxylate MOFs

Thomas W. Chamberlain,<sup>a,b</sup> Yasmine,<sup>c</sup> Claire T. Coulthard,<sup>a</sup> Guy J. Clarkson,<sup>a</sup> Volkan Degirmenci,<sup>b</sup> Yuni K. Krisnandi,<sup>c</sup> and Richard I. Walton<sup>\*a</sup>

<sup>a</sup> Department of Chemistry, University of Warwick, Coventry, CV4 7AL, UK

<sup>b</sup> School of Engineering, University of Warwick, Coventry, CV4 7AL, UK

<sup>c</sup> Department of Chemistry, Universitas Indonesia, Depok 16424, Indonesia

#### Lattice parameters of materials

**Table S1: Refined lattice parameters of Yb<sub>6</sub>-MOF (*P* $\bar{1}$ ) from powder diffraction compared with values determined by single crystal diffraction in our previous work, Burnett *et al.*, and by Weng *et al.***

|                                                      | <i>a</i> / Å | <i>b</i> / Å | <i>c</i> / Å | $\alpha$ / ° | $\beta$ / ° | $\gamma$ / ° |
|------------------------------------------------------|--------------|--------------|--------------|--------------|-------------|--------------|
| Pawley analysis (this work)                          | 11.428(6)    | 12.0951(21)  | 13.024(6)    | 86.876(13)   | 67.070(13)  | 72.202(7)    |
| Single crystal (Burnett <i>et al.</i> ) <sup>1</sup> | 11.3495(2)   | 11.9759(2)   | 12.9732(2)   | 86.754(1)    | 67.067(1)   | 72.156(1)    |
| Single crystal (Weng <i>et al.</i> ) <sup>2</sup>    | 11.363(3)    | 11.989(3)    | 12.987(4)    | 86.741(4)    | 67.084(4)   | 72.150(4)    |

**Table S2: Refined lattice parameters of UOW-3 (*P* $\bar{1}$ ) compared with values determined by single crystal diffraction in others' work**

|                                    | <i>a</i> / Å | <i>b</i> / Å | <i>c</i> / Å | $\alpha$ / ° | $\beta$ / ° | $\gamma$ / ° |
|------------------------------------|--------------|--------------|--------------|--------------|-------------|--------------|
| UOW-3 Single crystal (this work)   | 7.7973(3)    | 9.4775(4)    | 10.6851(4)   | 68.823(4)    | 70.748(3)   | 74.995(3)    |
| Feng <i>et al.</i> <sup>3</sup>    | 7.8413(7)    | 9.5545(8)    | 10.6561(9)   | 68.827(1)    | 71.024(1)   | 75.206(0)    |
| Zehnder <i>et al.</i> <sup>4</sup> | 7.782(2)     | 9.465(3)     | 10.681(3)    | 68.748(3)    | 70.677(3)   | 74.963(3)    |

**Table S3: Refined lattice parameters of UOW-4 (*Pbca*) from powder diffraction compared with values determined by single crystal diffraction, and for the Er analogue reported by Pan *et al.***

|                                                                                                      | <i>a</i> / Å | <i>b</i> / Å | <i>c</i> / Å |
|------------------------------------------------------------------------------------------------------|--------------|--------------|--------------|
| As made UOW-4 / TWC2                                                                                 | 9.6233(12)   | 26.2954(28)  | 37.7540(26)  |
| Single crystal                                                                                       | 9.59605(10)  | 26.1011(3)   | 37.7873(4)   |
| Er <sub>4</sub> (BDC) <sub>6</sub> (H <sub>2</sub> O) <sub>6</sub> (Pan <i>et al.</i> ) <sup>5</sup> | 9.661(2)     | 26.224(3)    | 37.863(3)    |

**Table S4: Refined lattice parameters of UOW-5 (*P2<sub>1</sub>/c*) from powder diffraction compared with values determined by single crystal diffraction.**

|                    | <i>a</i> / Å | <i>b</i> / Å | <i>c</i> / Å | $\beta$ / ° |
|--------------------|--------------|--------------|--------------|-------------|
| Powder Diffraction | 9.8467(25)   | 22.4394(6)   | 13.838(5)    | 108.527(10) |
| Single crystal     | 9.82977(6)   | 22.43648(14) | 13.79565(9)  | 108.6081(7) |

### FT-IR Spectra

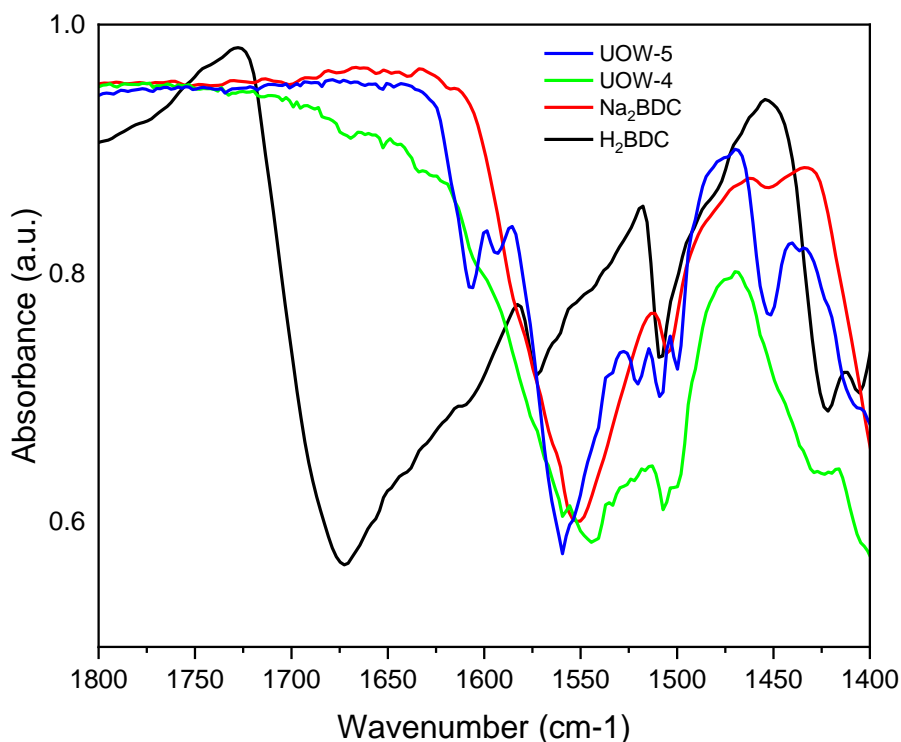

**Figure S1: FT-IR spectra showing the absence of carboxylate OH features in UOW-4 compared to UOW-5.**

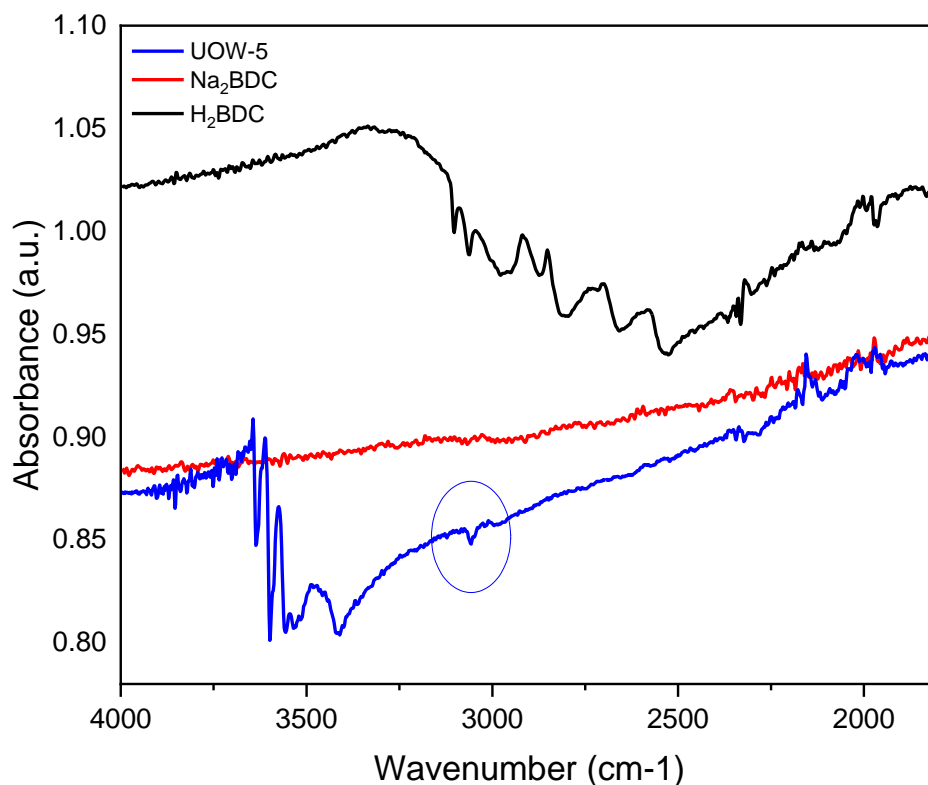

**Figure S2:** FT-IR spectra in the O-H stretch with carboxylate O-H indicated in UOW-5 by the circle. O-H stretches due to hydroxide ions are seen  $\sim 3700 - 3500 \text{ cm}^{-1}$ .

## REFERENCES

1. D. L. Burnett, R. Ozeerally, R. Pertiwi, T. W. Chamberlain, N. Cherkasov, G. J. Clarkson, Yuni K. Krisnandi, Volkan Degirmenci and R. I. Walton, *Chem. Commun.*, 2019, **55**, 11446-11449
2. D. F. Weng, X. J. Zheng and L. P. Jin, *Eur. J. Inorg. Chem.*, 2006, 4184 – 4190
3. S. Feng, *Acta Crystallogr. Sect. E: Struct. Rep. Online*, 2010, 66, m33
4. R. A. Zehnder, R. A. Renn, E. Pippin, M. Zeller, K. A. Wheeler, J. A. Carr, N. Fontaine and N. C. McMullen, *J. Mol. Struct.*, 2011, **985**, 109–119
5. L. Pan, N. Zheng, Y. Wu, S. Han, R. Yang, X. Huang and J. Li, *Inorg. Chem.* 2001, **40**, 828–830
